# Supplementary material for: Recruitment of Rpd3 to the Telomere Depends on the Protein Arginine Methyltransferase Hmt1
Source: PubMed Central journal article supplement (PMC3432115; doi:10.1371/journal.pone.0044656), 2012-08-31
Supplement: pone.0044656.s002.pdf [file pone.0044656.s002.pdf]

| Y-name    | Alias         | Growth Difference | p-value  |
|-----------|---------------|-------------------|----------|
| YDR448W   | <i>ADA2</i>   | -1                | 0.00417  |
| YGR204W   | <i>ADE3</i>   | -1                | 0.00906  |
| YER170W   | <i>ADK2</i>   | -0.9424           | 0.00321  |
| YNL270C   | <i>ALP1</i>   | -1                | 0.00018  |
| YBR288C   | <i>APM3</i>   | 0.5185            | 0.00336  |
| YHR013C   | <i>ARD1</i>   | -1                | 6.00E-05 |
| YER069W   | <i>ARG5,6</i> | -1                | 0.00194  |
| YML099C   | <i>ARG81</i>  | 0.7013            | 0.00025  |
| YGL157W   | <i>ARI1</i>   | -0.6604           | 0.0026   |
| YGL148W   | <i>ARO2</i>   | -0.9948           | 0.00041  |
| YBR200W   | <i>BEM1</i>   | -1                | 1.00E-05 |
| YER155C   | <i>BEM2</i>   | -1                | 0        |
| YER155C   | <i>BEM2</i>   | -1                | 0.11656  |
| YNL271C   | <i>BNI1</i>   | -1                | 0.00089  |
| YGR134W   | <i>CAF130</i> | 0.6711            | 0.00862  |
| YPL178W   | <i>CBC2</i>   | -0.9363           | 0.00031  |
| YBR131W   | <i>CCZ1</i>   | 1.3307            | 0.00186  |
| YPL132W   | <i>COX11</i>  | 0.6004            | 0.00464  |
| YMR078C   | <i>CTF18</i>  | 1.2622            | 0.00271  |
| YPL181W   | <i>CTI6</i>   | -0.9469           | 9.00E-05 |
| YEL027W   | <i>CUP5</i>   | -1                | 0.03757  |
| YAL013W   | <i>DEP1</i>   | -1                | 0.05717  |
| YDR069C   | <i>DOA4</i>   | -1                | 0.01032  |
| YDR424C   | <i>DYN2</i>   | 0.7667            | 0.00959  |
| YHR021W-A | <i>ECM12</i>  | 0.7133            | 4.00E-05 |
| YBR033W   | <i>EDS1</i>   | -1                | 0.1096   |
| YHR193C   | <i>EGD2</i>   | 0.7265            | 0.00582  |
| YER044C   | <i>ERG28</i>  | -1                | 0.00395  |
| YLR056W   | <i>ERG3</i>   | -0.9215           | 0.00118  |
| YOR033C   | <i>EXO1</i>   | -1                | 2.00E-05 |
| YIL065C   | <i>FIS1</i>   | 0.5582            | 0.00073  |
| YML074C   | <i>FPR3</i>   | 0.5228            | 0.00655  |
| YGR252W   | <i>GCN5</i>   | -1                | 0        |
| YNL153C   | <i>GIM3</i>   | -0.6891           | 0.00061  |
| YML094W   | <i>GIM5</i>   | -0.9085           | 0.00061  |
| YJR090C   | <i>GRR1</i>   | -1                | 0.41582  |
| YBR121C   | <i>GRS1</i>   | -0.9824           | 0.0019   |
| YPL254W   | <i>HFI1</i>   | -1                | 4.00E-05 |
| YML075C   | <i>HMG1</i>   | 2.9879            | 0.00678  |
| YOR025W   | <i>HST3</i>   | 0.5472            | 5.00E-05 |
| YER078C   | <i>ICP55</i>  | 0.6798            | 0.00424  |
| YJL073W   | <i>JEM1</i>   | 0.5306            | 0.00866  |

|           |               |         |          |
|-----------|---------------|---------|----------|
| YDR532C   | <i>KRE28</i>  | -1      | 0.00018  |
| YCL005W   | <i>LDB16</i>  | -1      | 0.0186   |
| YBL006C   | <i>LDB7</i>   | -1      | 0.00041  |
| YIR034C   | <i>LYS1</i>   | -1      | 0.00099  |
| YGR292W   | <i>MAL12</i>  | 0.7422  | 0.00933  |
| YJL102W   | <i>MEF2</i>   | 0.5676  | 0.00368  |
| YOR211C   | <i>MGM1</i>   | -0.7093 | 0.00442  |
| YHR015W   | <i>MIP6</i>   | -0.9635 | 0.00253  |
| YNL284C   | <i>MRPL10</i> | -0.8216 | 0.00384  |
| YKR006C   | <i>MRPL13</i> | -0.8122 | 0.00516  |
| YDR322W   | <i>MRPL35</i> | -0.6822 | 3.00E-05 |
| YPR100W   | <i>MRPL51</i> | -0.7208 | 0.00962  |
| YOL116W   | <i>MSN1</i>   | 0.691   | 0.00701  |
| YDR335W   | <i>MSN5</i>   | -0.9718 | 4.00E-05 |
| YDR176W   | <i>NGG1</i>   | -1      | 0.1222   |
| YML118W   | <i>NGL3</i>   | 0.6789  | 0.00079  |
| YPR072W   | <i>NOT5</i>   | 0.6124  | 0.00128  |
| YGL151W   | <i>NUT1</i>   | -0.9626 | 0.00039  |
| YGL038C   | <i>OCH1</i>   | -1      | 0.09213  |
| YOR036W   | <i>PEP12</i>  | -0.9351 | 0.00108  |
| YGL153W   | <i>PEX14</i>  | -1      | 0.00028  |
| YJL179W   | <i>PFD1</i>   | -1      | 0.37715  |
| YNL097C   | <i>PHO23</i>  | -1      | 0.00204  |
| YOL001W   | <i>PHO80</i>  | -0.9602 | 5.00E-05 |
| YML107C   | <i>PML39</i>  | 0.5763  | 0.00999  |
| YPL144W   | <i>POC4</i>   | -1      | 0.01867  |
| YNR052C   | <i>POP2</i>   | 0.5609  | 0.00587  |
| YPL188W   | <i>POS5</i>   | -1      | 0        |
| YGR135W   | <i>PRE9</i>   | -0.8355 | 0.0012   |
| YER095W   | <i>RAD51</i>  | 0.5531  | 0.00492  |
| YGL058W   | <i>RAD6</i>   | -0.9551 | 0.00488  |
| YBL033C   | <i>RIB1</i>   | -1      | 0.00084  |
| YHL027W   | <i>RIM101</i> | -0.7184 | 5.00E-05 |
| YMR154C   | <i>RIM13</i>  | -0.5818 | 0.00267  |
| YOR275C   | <i>RIM20</i>  | -0.655  | 0.00527  |
| YGL046W   | <i>RIM8</i>   | -0.5905 | 0.0065   |
| YEL072W   | <i>RMD6</i>   | -0.999  | 2.00E-05 |
| YBR084C-A | <i>RPL19A</i> | 0.5464  | 0.00654  |
| YDL075W   | <i>RPL31A</i> | -1      | 0.0065   |
| YGL147C   | <i>RPL9A</i>  | -0.9481 | 0.00355  |
| YLR357W   | <i>RSC2</i>   | -1      | 0.10667  |
| YBR095C   | <i>RXT2</i>   | -0.9965 | 8.00E-05 |
| YDL076C   | <i>RXT3</i>   | 0.6555  | 0.00388  |

|           |         |         |          |
|-----------|---------|---------|----------|
| YMR263W   | SAP30   | -1      | 0.00011  |
| YIL076W   | SEC28   | 1.344   | 0.00578  |
| YGL066W   | SGF73   | -0.9159 | 8.00E-05 |
| YOL004W   | SIN3    | -1      | 2.00E-05 |
| YDL047W   | SIT4    | -0.6395 | 0.00307  |
| YCR024C   | SLM5    | -0.5313 | 0.00294  |
| YOR290C   | SNF2    | -0.9678 | 3.00E-05 |
| YHL025W   | SNF6    | -1      | 0.01683  |
| YLR025W   | SNF7    | -1      | 0.04328  |
| YMR096W   | SNZ1    | 0.6809  | 0.00936  |
| YGL127C   | SOH1    | 1.0458  | 0.00129  |
| YHR014W   | SPO13   | -1      | 6.00E-05 |
| YER161C   | SPT2    | -0.9726 | 0.00305  |
| YNL025C   | SSN8    | 3.7261  | 0.00968  |
| YCL032W   | STE50   | -0.9974 | 0.00011  |
| YLR372W   | SUR4    | -0.9855 | 0.00026  |
| YBR231C   | SWC5    | -1      | 0.02687  |
| YJL176C   | SWI3    | -0.9802 | 0.00203  |
| YDR079C-A | TFB5    | -0.5832 | 0.0022   |
| YDL185W   | TFP1    | -1      | 0.02725  |
| YHR025W   | THR1    | -0.7992 | 0.00644  |
| YAL016W   | TPD3    | -1      | 0.11161  |
| YDR007W   | TRP1    | 18.1934 | 0.00443  |
| YMR071C   | TVP18   | 0.6407  | 0.00573  |
| YBR058C   | UBP14   | 7.2239  | 0.00458  |
| YBR173C   | UMP1    | -1      | 0.00028  |
| YKL080W   | VMA5    | -1      | 1.00E-05 |
| YGR020C   | VMA7    | -1      | 0.02928  |
| YEL051W   | VMA8    | -1      | 0.04396  |
| YKL119C   | VPH2    | -0.8471 | 0.00165  |
| YPL045W   | VPS16   | -0.9268 | 0.00659  |
| YMR077C   | VPS20   | -0.9566 | 0.00821  |
| YOR083W   | WHI5    | 0.5228  | 5.00E-05 |
| YPL239W   | YAR1    | 0.5351  | 0.00115  |
| YDR056C   | YDR056C | -1      | 0.00016  |
| YOL128C   | YGK3    | 0.5663  | 0.00175  |
| YGL159W   | YGL159W | -0.8336 | 0.00219  |
| YHR029C   | YHI9    | -1      | 2.00E-05 |
| YGL161C   | YIP5    | -1      | 0.00252  |
| YJR011C   | YJR011C | -0.991  | 0        |
| YLR200W   | YKE2    | -1      | 0.00144  |
| YPR063C   | YPR063C | 0.538   | 0.00052  |
| YPR071W   | YPR071W | 0.6462  | 0.00682  |

|         |                |         |         |
|---------|----------------|---------|---------|
| YPR084W | <i>YPR084W</i> | 0.5744  | 0.00185 |
| YGL164C | <i>YRB30</i>   | -0.9629 | 0.0018  |
